# Supplementary material for: A multidisciplinary study unveils the nature of a Roman ink of the I century AD
Source: Sci Rep. 2021 Mar 31;11:7231. doi: 10.1038/s41598-021-86288-x (PMC8012642; doi:10.1038/s41598-021-86288-x)
Supplement: Supplementary file 1 — Supplementary Information [file 41598_2021_86288_MOESM1_ESM.pdf]

## SUPPLEMENTARY INFORMATION

# A multidisciplinary study unveils the nature of a Roman ink of the I century AD

**Mirta Sibilial<sup>1</sup>, Chiaramaria Stani<sup>2\*</sup>, Lara Gigli<sup>3</sup>, Simone Pollastri<sup>3</sup>, Alessandro Migliori<sup>1</sup>  
 Francesco D'Amico<sup>3</sup>, Chiara Schmid<sup>4</sup>, Sabina Licen<sup>5</sup>, Matteo Crosera<sup>5</sup>, Gianpiero Adami<sup>5</sup>,  
 Pierluigi Barbieri<sup>5</sup>, Jasper R. Plaisier<sup>3</sup>, Giuliana Aquilanti<sup>3</sup>, Lisa Vaccari<sup>3</sup>, Stefano Buson<sup>6</sup>,  
 Federica Gonzato<sup>6\*</sup>**

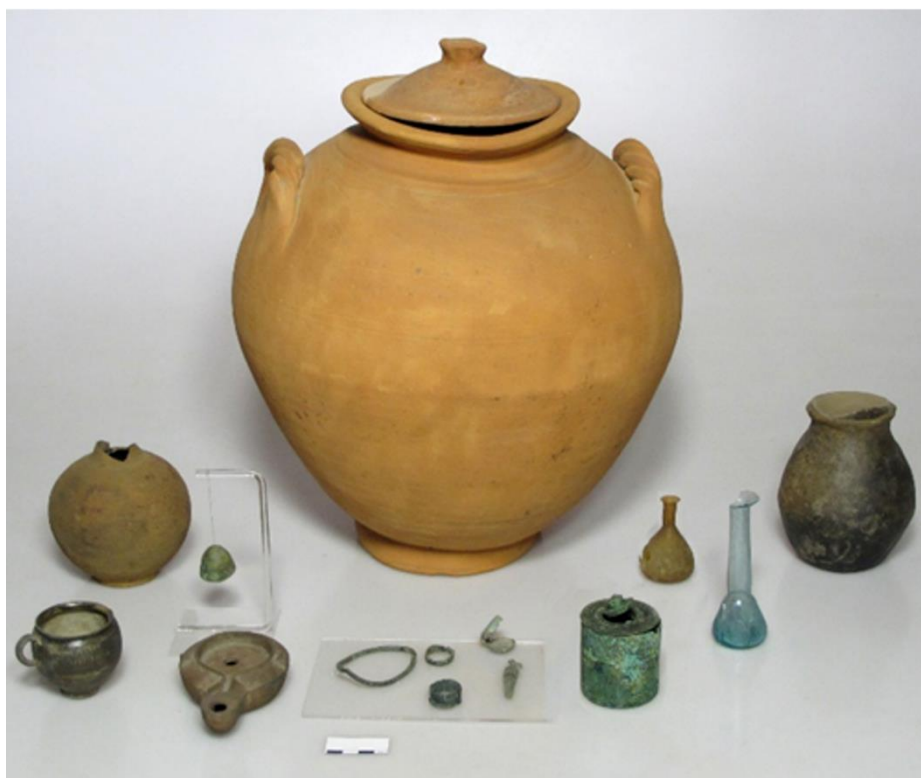

Supplementary Figure S1: Archaeological context. Grave goods of civic tomb XII, as exposed at the Museo Nazionale Atestino of Este, Padua, Italy. The grave good is composed by a big funerary clay urn, some jewels, a couple of *unguentaria*, some potteries and a lamp.

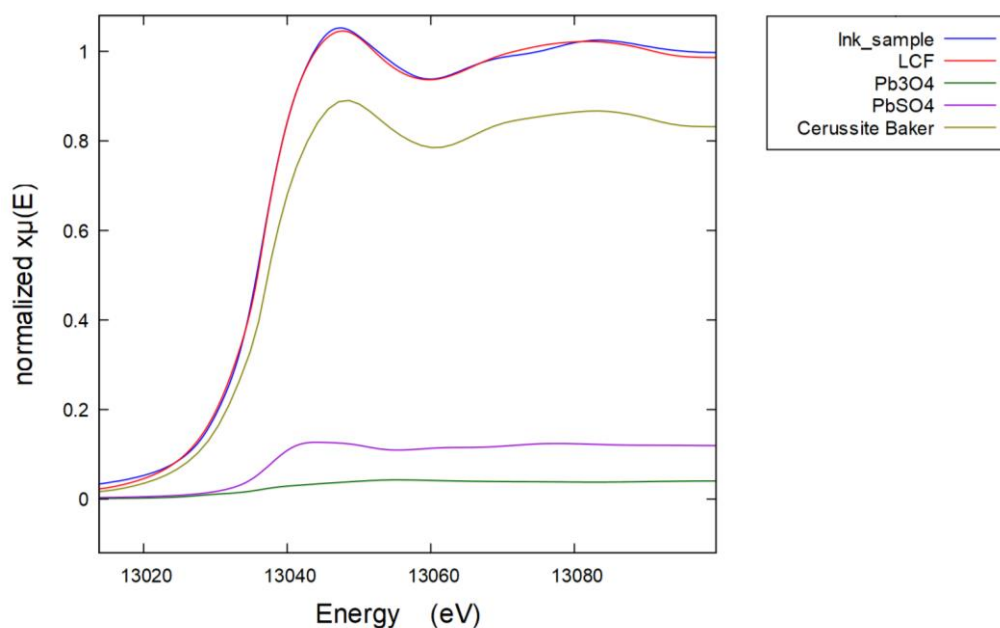

Supplementary Figure S2: XANES Linear Combination Fitting (LCF) analysis of the Ink spectrum performed using the Athena software package.

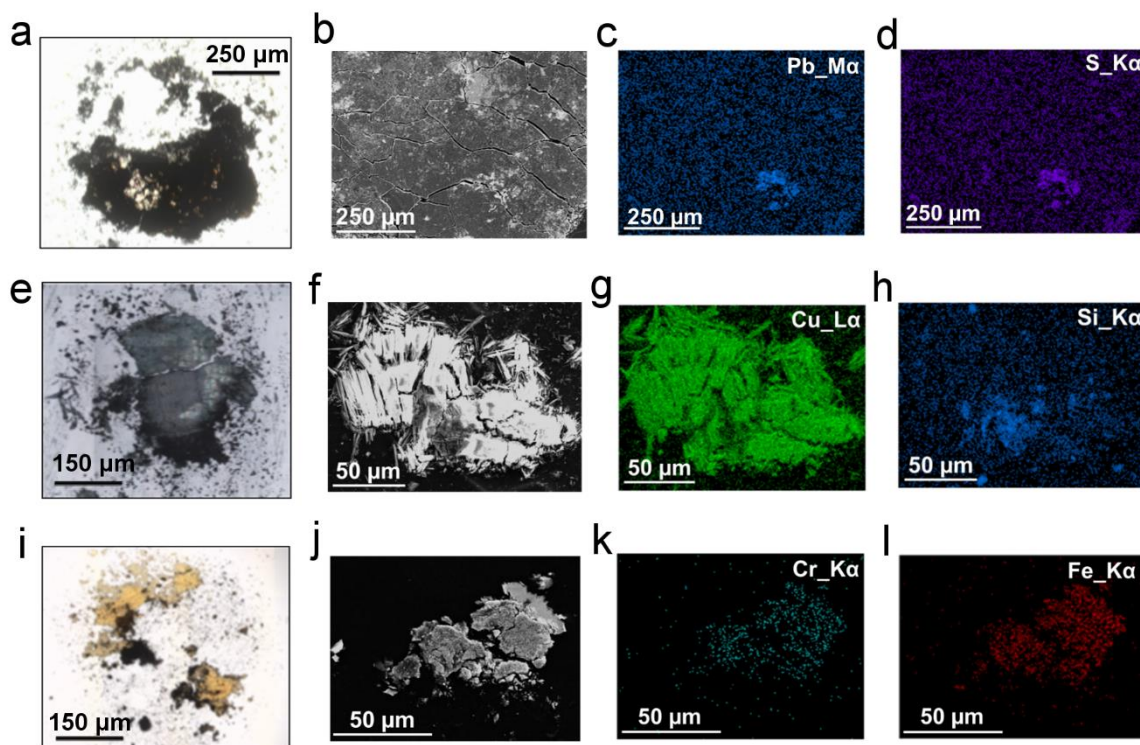

Supplementary Figure S3: a-b. optical and SEM images of an ink particle; c-d. EDX maps for Pb M $\alpha$  and S K $\alpha$ . Pb and S co-localize and can represent a trace of Anglesite (PbSO<sub>4</sub>); e-f. optical and SEM images of a green flake; g-h. EDX maps for Cu L $\alpha$  and Si K $\alpha$ . The sample is mainly composed by Cu; i-j. optical and SEM images of an orange flake; k-l. EDX maps for Cr K $\alpha$  and Fe M $\alpha$ . Cr and Fe co-localize and can represent an iron chromium oxide (FeO, Cr<sub>2</sub>O<sub>3</sub> or FeCr<sub>2</sub>O<sub>4</sub>).

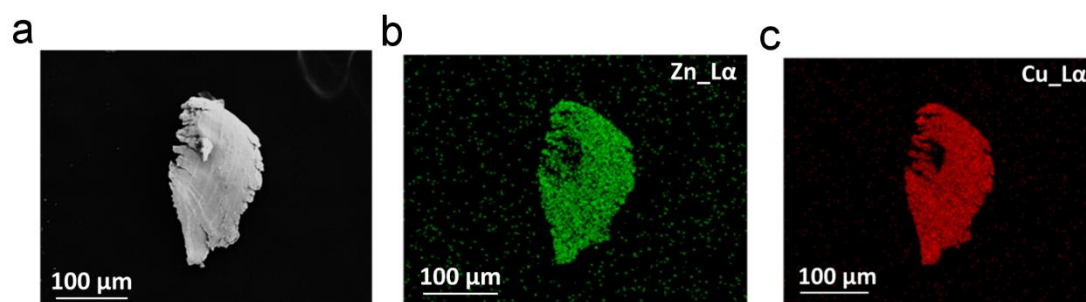

Supplementary Figure S4: a) SEM image of a metallic flake recovered in the ink powder; b-c) EDX maps for Zn Lα and Cu Lα.

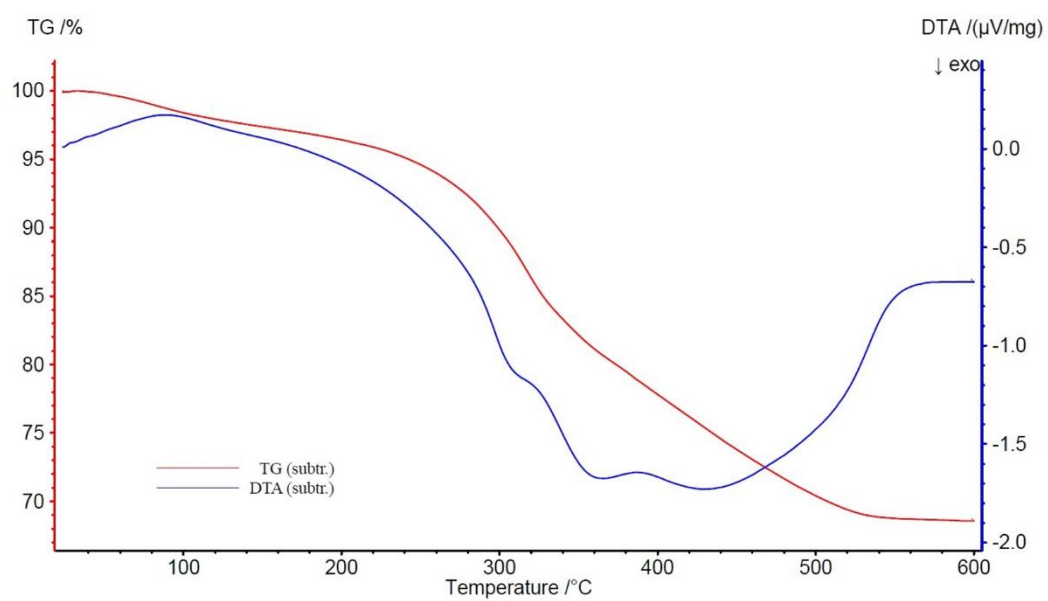

Supplementary Figure S5: TGA-DTA curves.

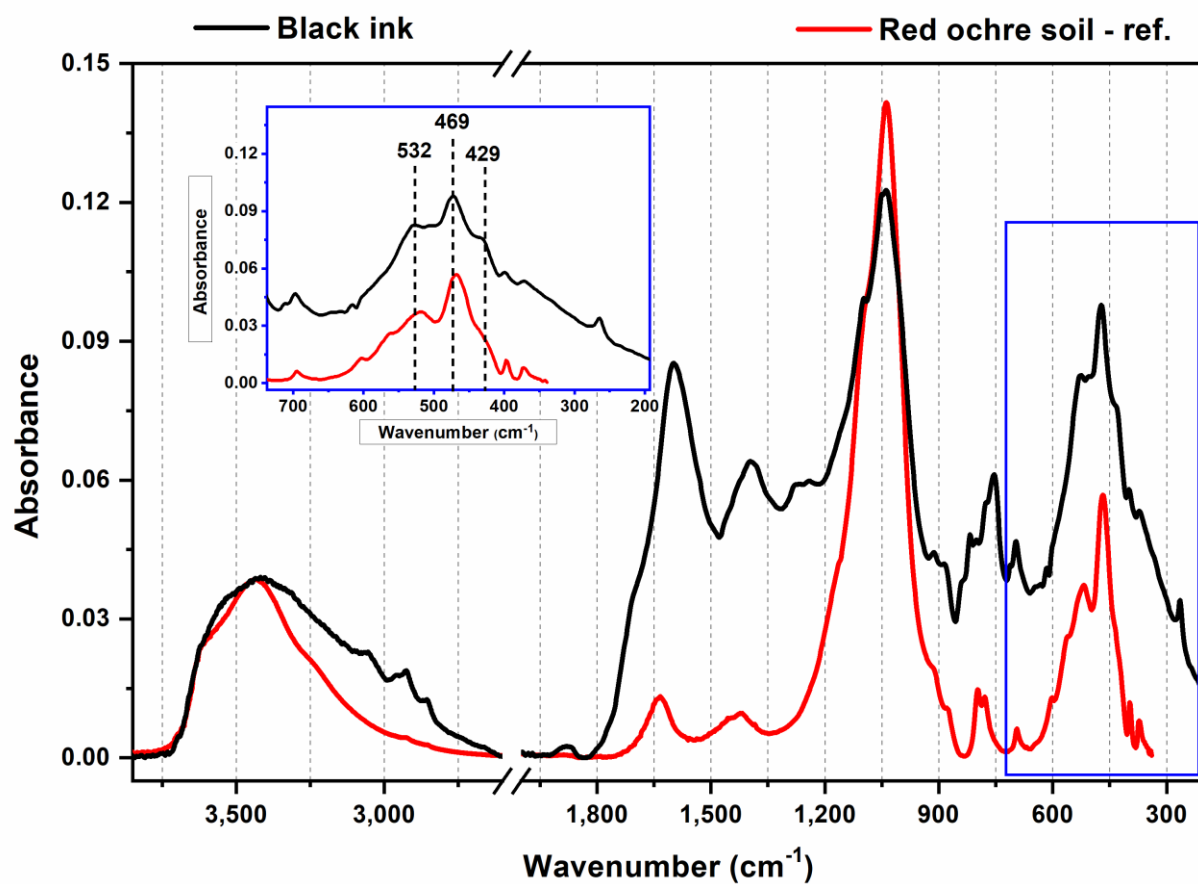

Supplementary Figure S6: Infrared spectra of ink (black line) compared with a red ochre reference spectrum. In the inset, the region at lower wavenumbers. The peaks attributed to the presence of iron oxides are highlighted.
